# Supplementary material for: Click gold quantum dots biosynthesis with conjugation of quercetin for adenocarcinoma exertion
Source: Royal Society of Chemistry journal article supplement (doi:10.1039/d2ra02529a), 2022-01-01
Supplement: d2ra02529a1.pdf [file d2ra02529a1.pdf]

## Supplementary Information

### Click Gold Quantum Dots Biosynthesis with Conjugation of Quercetin for Adenocarcinoma Exertion

Amol V. Pansare<sup>‡a,b</sup>, Priyanka V. Pansare<sup>‡c</sup>, Amol A. Shedge<sup>b</sup>, Shubham V. Pansare<sup>b</sup>, Vishwanath R. Patil<sup>b\*</sup>, Giovanni P. Terrasi<sup>a\*</sup> and Kamini J. Donde<sup>c\*</sup>

‡ Authors contributed equally

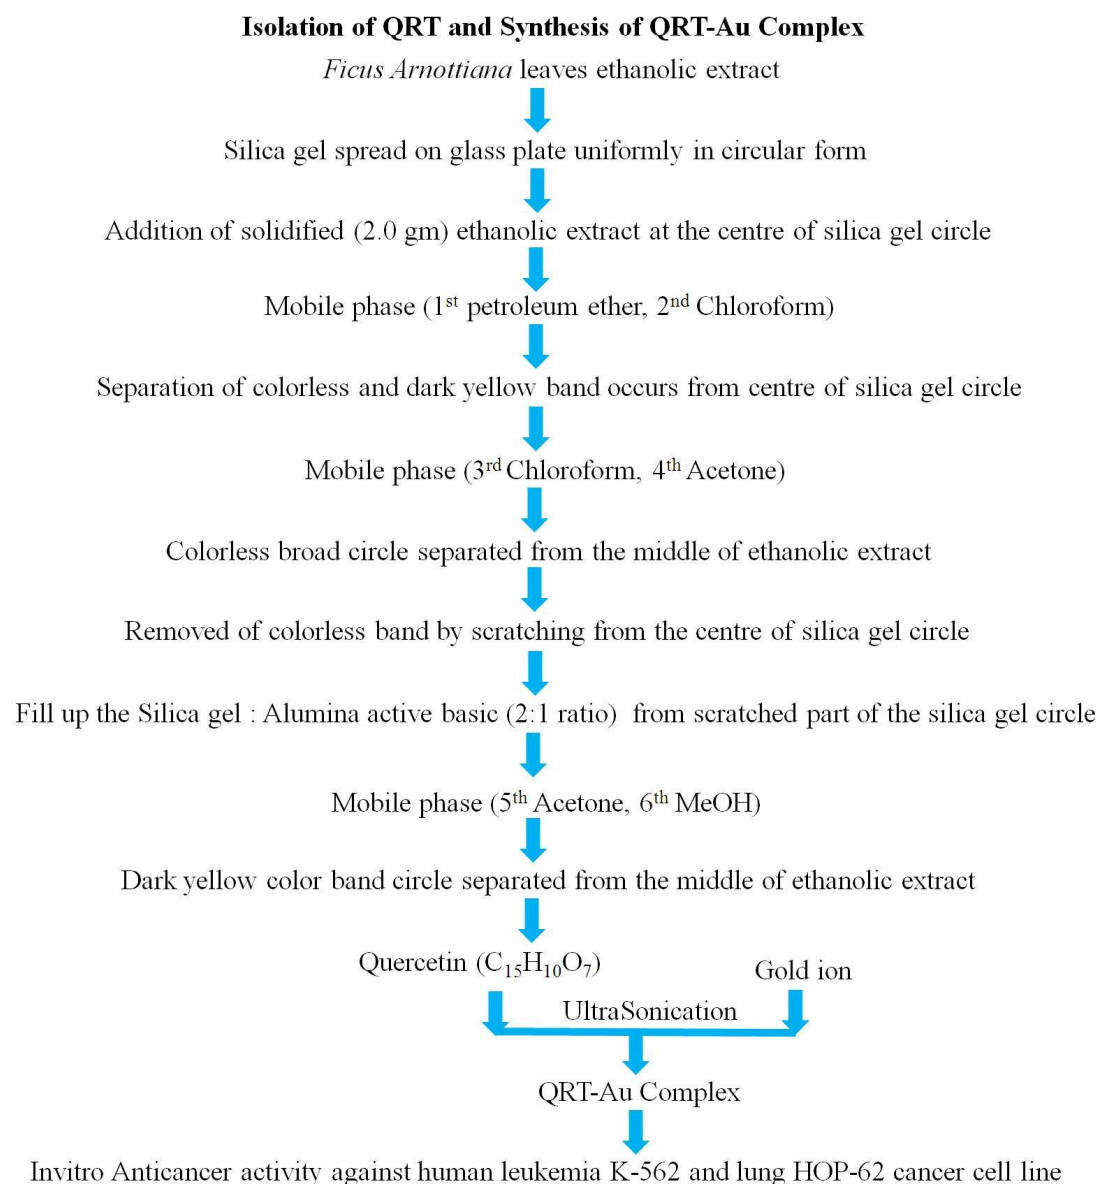

**Fig. S1** Flow sheet diagram of isolation of QRT and synthesis of QRT-AuQDS.

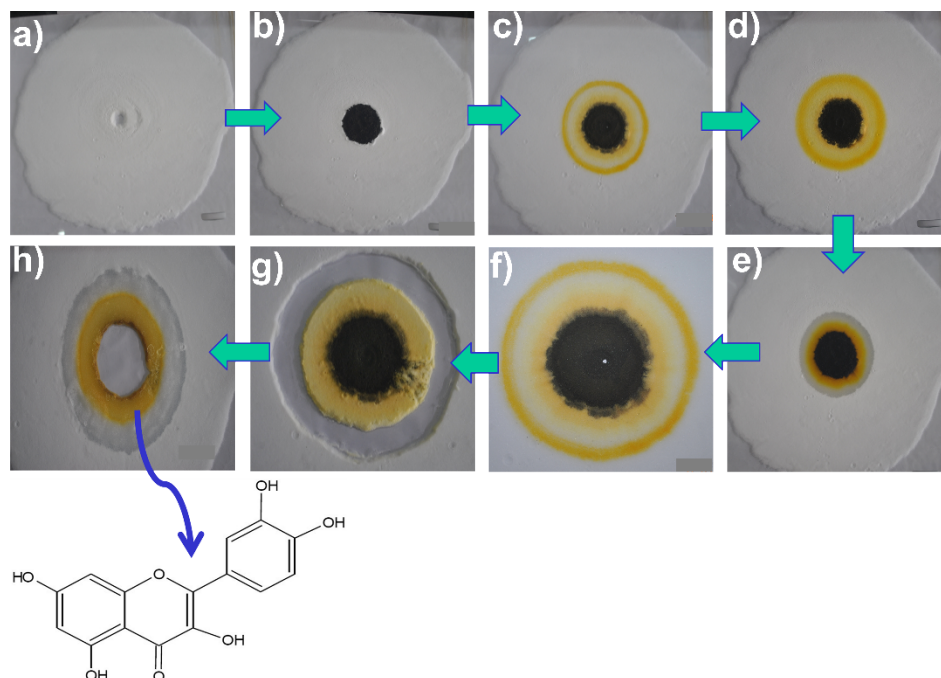

**Fig. S2** **a)** Circularly spreaded silica gel on a glass plate. **b)** Ethanol extract of *F. Arnottiana* leaves were subjected at the centre of the CSSGLT. **c)** 1<sup>st</sup> mobile phase (petroleum ether), separation of dark yellow colored band occurred from centre of silica gel circle. **d)** 2<sup>nd</sup> mobile phase (petroleum ether and chloroform in 1:1 ratio), was used and dark yellow colored band was separated from centre of silica gel circle. **e)** 3<sup>rd</sup> mobile phase (Chloroform) was used to separate yellow colored broad circle from the middle of ethanol extract. **f)** 4<sup>th</sup> mobile phase (chloroform and acetone in 2:1 ratio) was used to separate colorless broad circle from the middle of ethanol extract. **g)** Colorless part was scratched and picked up from the spreaded silica gel and the scratched area was filled up by aluminum oxide active base. **h)** 5<sup>th</sup> mobile phase (acetone and methanol in 2:1 ratio) was used and dark yellow colored circular band was separated from middle of ethanol extract.

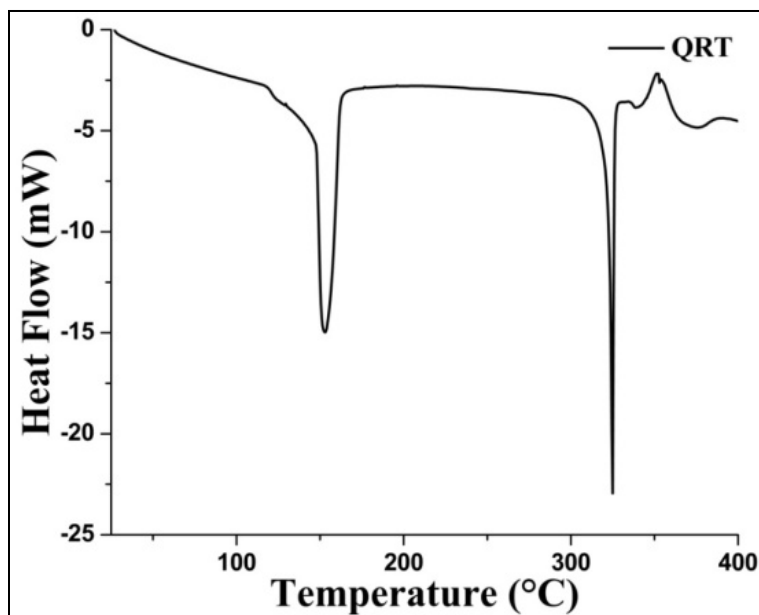

Fig. S3 DSC thermogram of QRT

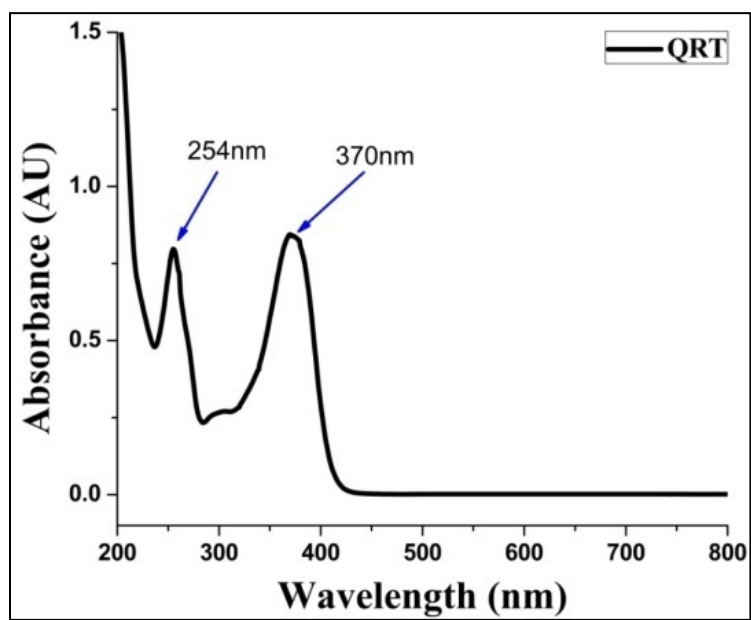

Fig. S4 UV-Vis absorption spectrum of QRT.

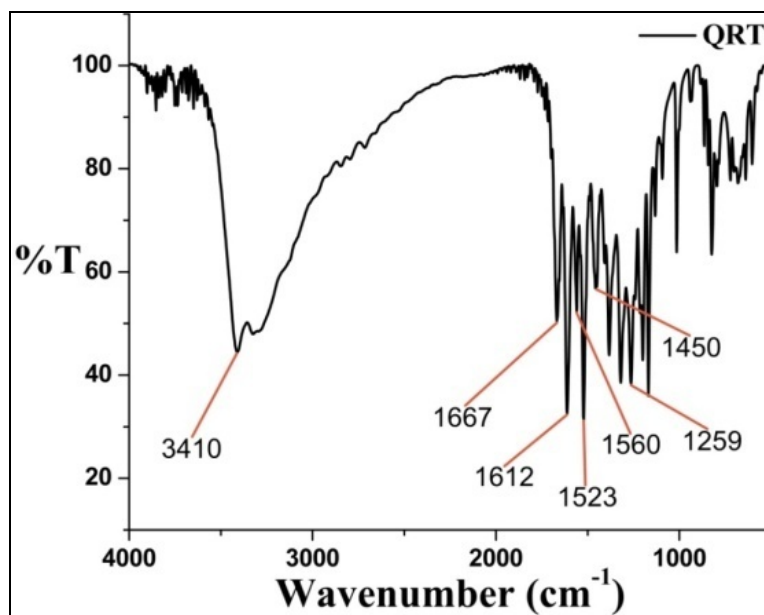

Fig. S5 FTIR spectrum of QRT.

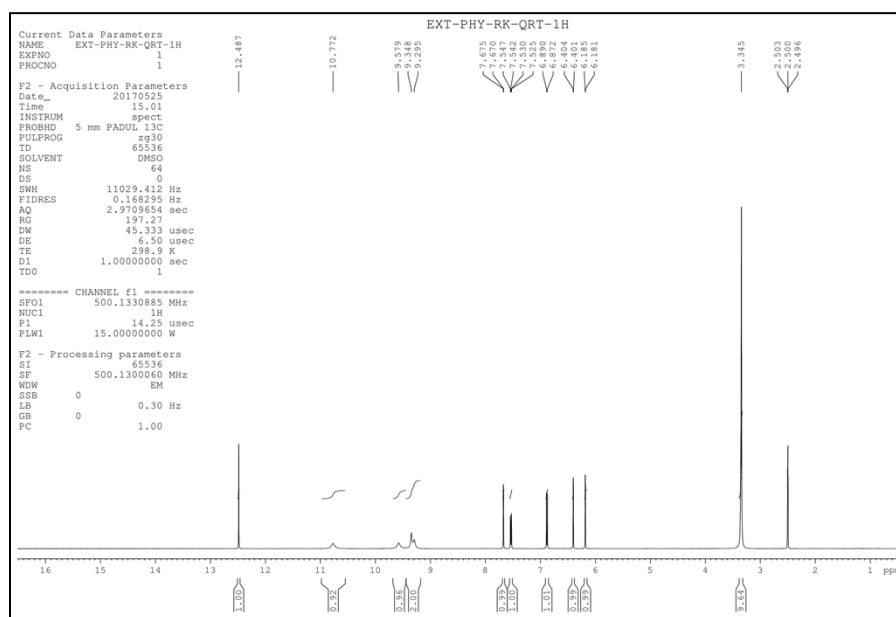

Fig. S6 <sup>1</sup>H NMR spectrum of QRT

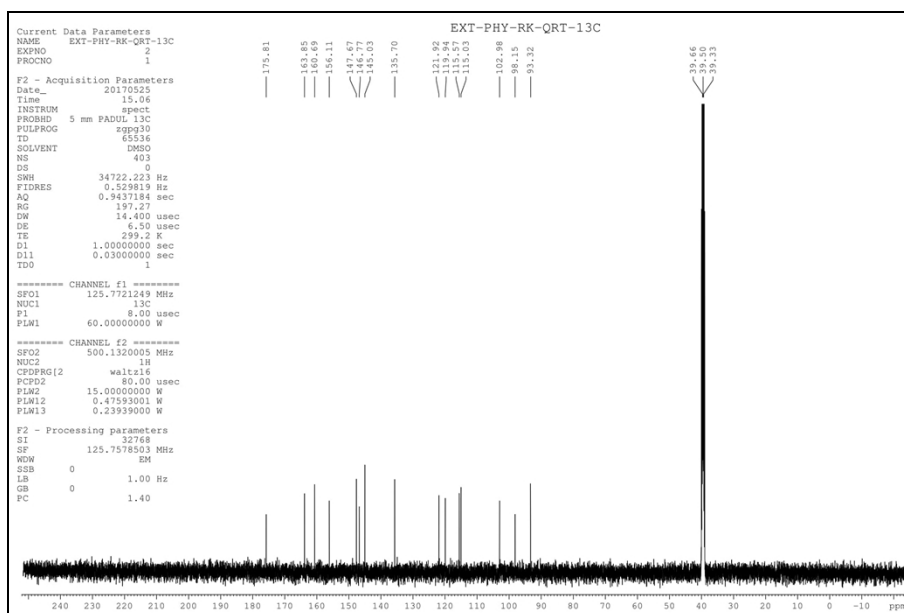

Fig. S7  $^{13}\text{C}$  NMR spectrum of QRT

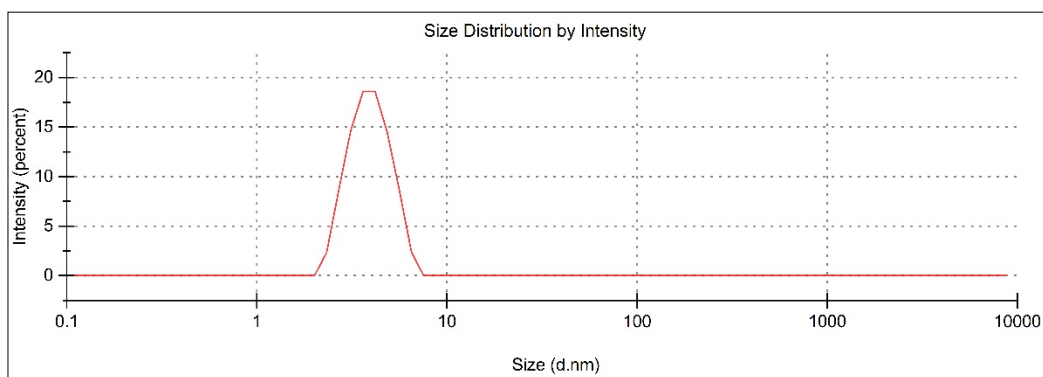

Fig.S8 DLS histogram of colloidal QRT-AuQDs (c) Zeta potential.

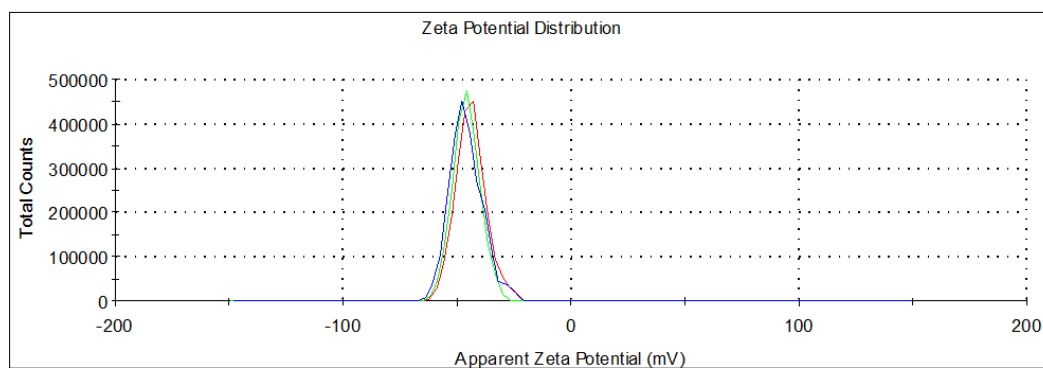

Fig.S9 Zeta potential of QRT-AuQDs

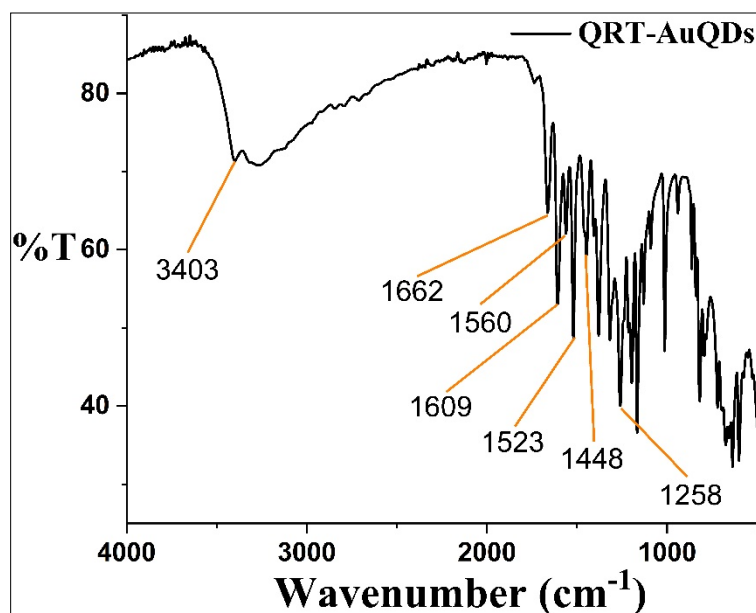

**Fig. S10** FTIR spectrum of QRT-AuQDs.

**Table S1** Human Lung HOP-62 cancer cell line activity of QRT and QRT-AuQDs.

| Human Lung Cancer Cell Line HOP-62 |              |           |           |           |                |           |           |           |
|------------------------------------|--------------|-----------|-----------|-----------|----------------|-----------|-----------|-----------|
| % Control Growth                   |              |           |           |           |                |           |           |           |
| Molar Drug Concentrations          |              |           |           |           |                |           |           |           |
|                                    | Experiment 1 |           |           |           | Experiment 2   |           |           |           |
| Conc.                              | $10^{-7}$    | $10^{-6}$ | $10^{-5}$ | $10^{-4}$ | $10^{-7}$      | $10^{-6}$ | $10^{-5}$ | $10^{-4}$ |
| QRT                                | 72.6         | 62.5      | -16.4     | -18.8     | 26.5           | 51.4      | -17.7     | -20.2     |
| QRT-AuQDs                          | 69.2         | 58.2      | -26.0     | -26.8     | 18.2           | 40.1      | -20.9     | -22.6     |
| ADR                                | 84.7         | 40.0      | -10.5     | -25.9     | -2.2           | 14.0      | -26.6     | -38.7     |
|                                    | Experiment 3 |           |           |           | Average Values |           |           |           |
| Conc.                              | $10^{-7}$    | $10^{-6}$ | $10^{-5}$ | $10^{-4}$ | $10^{-7}$      | $10^{-6}$ | $10^{-5}$ | $10^{-4}$ |
| QRT                                | -30.3        | 16.0      | -15.5     | -25.7     | 22.9           | 43.3      | -16.5     | -21.6     |
| QRT-AuQDs                          | -4.5         | 48.4      | -28.7     | -28.8     | 27.8           | 48.9      | -25.2     | -26.1     |

|     |       |      |       |       |      |      |       |       |
|-----|-------|------|-------|-------|------|------|-------|-------|
| ADR | -26.8 | -8.8 | -25.3 | -39.1 | 18.6 | 15.1 | -20.8 | -34.5 |
|-----|-------|------|-------|-------|------|------|-------|-------|

**Table S2** Human Leukemia K-562 cancer cell line activity of QRT and QRT-AuQDs.

| Human Leukemia Cancer Cell Line K-562 |              |           |           |           |                |           |           |           |
|---------------------------------------|--------------|-----------|-----------|-----------|----------------|-----------|-----------|-----------|
| % Control Growth                      |              |           |           |           |                |           |           |           |
| Molar Drug Concentrations             |              |           |           |           |                |           |           |           |
|                                       | Experiment 1 |           |           |           | Experiment 2   |           |           |           |
| Conc.                                 | $10^{-7}$    | $10^{-6}$ | $10^{-5}$ | $10^{-4}$ | $10^{-7}$      | $10^{-6}$ | $10^{-5}$ | $10^{-4}$ |
| QRT                                   | 66.6         | 57.9      | 53.2      | 29.1      | 54.5           | 42.4      | 41.0      | 23.6      |
| QRT-AuQDs                             | 45.1         | 49.1      | 27.1      | 18.9      | 37.2           | 34.6      | -20.4     | 10.4      |
| ADR                                   | 26.5         | 17.6      | 13.1      | 18.0      | 27.9           | 27.3      | 19.2      | 34.9      |
|                                       | Experiment 3 |           |           |           | Average Values |           |           |           |
| Conc.                                 | $10^{-7}$    | $10^{-6}$ | $10^{-5}$ | $10^{-4}$ | $10^{-7}$      | $10^{-6}$ | $10^{-5}$ | $10^{-4}$ |
| QRT                                   | 40.5         | 55.7      | 46.0      | 23.8      | 53.9           | 52.0      | 46.7      | 25.5      |
| QRT-AuQDs                             | 33.3         | 48.2      | 30.5      | 24.1      | 38.5           | 44.0      | 26.0      | 17.8      |
| ADR                                   | 34.5         | 47.1      | 34.6      | 16.8      | 29.6           | 30.6      | 22.3      | 23.3      |
